# Supplementary material
Source: Springer Nature journal article supplement (https://www.springermedizin.de/resource/supplementary/12885_2013_4284_MOESM3_ESM.pdf/9466820)

**OUT-PATSAT35 mean scores\***

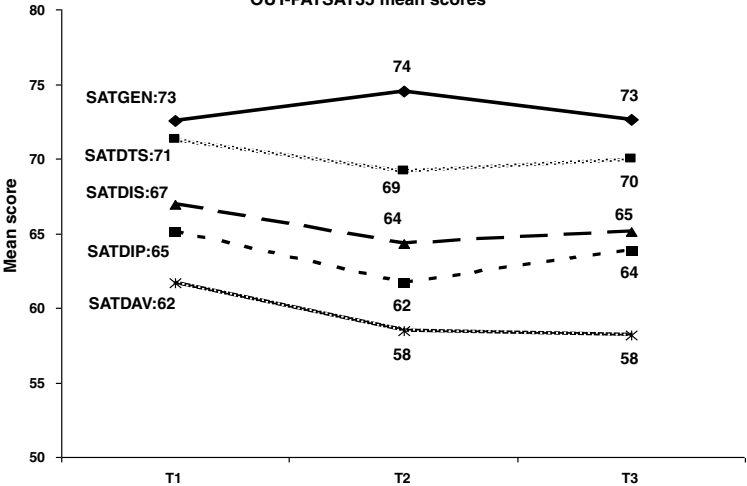

**QLQ-C30 mean scores\***

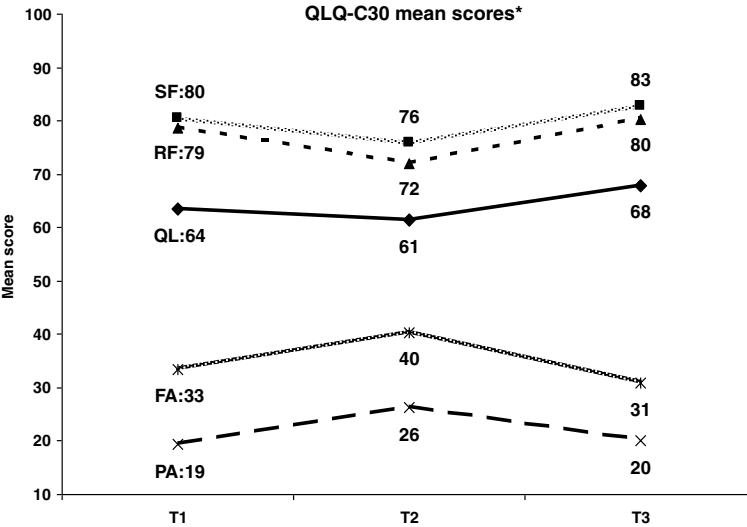

Supplement: MOESM3 [file 9466820]
